# Supplementary material for: Computational Methods and Software Tools for Functional Analysis of miRNA Data
Source: PubMed Central journal article supplement (PMC7563698; doi:10.3390/biom10091252), 2020-08-28

## Supplementary material:

# Computational methods and software tools for functional analysis of miRNA data

Adrian Garcia-Moreno<sup>1</sup>, Pedro Carmona-Saez<sup>1,2</sup>

<sup>1</sup> Bioinformatics Unit, GENYO Centre for Genomics and Oncological Research: Pfizer/University of Granada/Andalusian Regional Government, PTS Granada, 18016 Granada, Spain

<sup>2</sup> Department of Statistics, University of Granada, 18071 Granada, Spain.

**Table S1.** miRNet top 25 KEGG enriched terms, using validated targets of TarBase and MirTarBase.

| Name                                        | Pval     | adj.Pval     |
|---------------------------------------------|----------|--------------|
| Pathways in cancer                          | 7.22E-12 | 7.22E-10     |
| Protein processing in endoplasmic reticulum | 1.04E-10 | 5.2E-09      |
| RNA transport                               | 1.38E-09 | 4.6E-08      |
| Neurotrophin signaling pathway              | 5.27E-09 | 1.3175E-07   |
| Cell cycle                                  | 1.05E-08 | 2.1E-07      |
| Prostate cancer                             | 3.97E-08 | 6.616667E-07 |
| Renal cell carcinoma                        | 1.02E-07 | 1.457143E-06 |
| p53 signaling pathway                       | 1.37E-07 | 1.7125E-06   |
| Influenza A                                 | 5.63E-07 | 6.090909E-06 |
| Chagas disease (American trypanosomiasis)   | 6.1E-07  | 6.090909E-06 |
| Chronic myeloid leukemia                    | 6.7E-07  | 6.090909E-06 |
| Epstein-Barr virus infection                | 7.85E-07 | 6.276923E-06 |
| HTLV-I infection                            | 8.16E-07 | 6.276923E-06 |
| Small cell lung cancer                      | 3.3E-06  | 2.357143E-05 |
| mRNA surveillance pathway                   | 4.21E-06 | 2.70625E-05  |
| Pancreatic cancer                           | 4.33E-06 | 2.70625E-05  |
| Colorectal cancer                           | 7.22E-06 | 4.247059E-05 |
| ErbB signaling pathway                      | 1.22E-05 | 6.777778E-05 |
| Bacterial invasion of epithelial cells      | 1.32E-05 | 6.947368E-05 |
| Focal adhesion                              | 1.87E-05 | 9.35E-05     |
| Regulation of actin cytoskeleton            | 3.59E-05 | 0.0001709524 |
| Toxoplasmosis                               | 5.23E-05 | 0.0002377273 |
| Wnt signaling pathway                       | 6.03E-05 | 0.0002621739 |
| Fc gamma R-mediated phagocytosis            | 6.96E-05 | 0.00029      |
| MAPK signaling pathway                      | 7.7E-05  | 0.0002951852 |

**Table S2.** GeneCodis top 25 results of co-annotated KEGG enriched terms.

| term                                                                                                                                                                                                                                 | hyp_pval    | hyp_pval_adj |
|--------------------------------------------------------------------------------------------------------------------------------------------------------------------------------------------------------------------------------------|-------------|--------------|
| Pathways in cancer                                                                                                                                                                                                                   | 1.84293E-10 | 4.75886E-08  |
| Pathways in cancer,Human papillomavirus infection,Pancreatic cancer                                                                                                                                                                  | 1.72536E-10 | 5.01217E-08  |
| Human cytomegalovirus infection,Pathways in cancer,Hepatitis C,Human papillomavirus infection,Pancreatic cancer                                                                                                                      | 1.59675E-10 | 5.30122E-08  |
| Human cytomegalovirus infection,Pathways in cancer,Melanoma,Breast cancer,Hepatitis C,Human papillomavirus infection,Non-small cell lung cancer,Hepatocellular carcinoma,Pancreatic cancer, <b>Glioma</b>                            | 2.49424E-10 | 5.79661E-08  |
| Human papillomavirus infection                                                                                                                                                                                                       | 5.19338E-11 | 6.03471E-08  |
| Pathways in cancer,Endocrine resistance                                                                                                                                                                                              | 1.58998E-10 | 6.15851E-08  |
| Pathways in cancer,Breast cancer,PI3K-Akt signaling pathway,Non-small cell lung cancer,Pancreatic cancer                                                                                                                             | 8.62528E-11 | 6.68171E-08  |
| Human cytomegalovirus infection,Kaposi sarcoma-associated herpesvirus infection,Pathways in cancer,Hepatitis C,Human papillomavirus infection,Cellular senescence,Chronic myeloid leukemia,Pancreatic cancer                         | 1.49007E-10 | 6.92583E-08  |
| Pathways in cancer,Human papillomavirus infection,Cellular senescence                                                                                                                                                                | 1.20916E-10 | 7.02524E-08  |
| Human papillomavirus infection,Cellular senescence                                                                                                                                                                                   | 4.14997E-11 | 9.64453E-08  |
| Human cytomegalovirus infection,Pathways in cancer,Melanoma,Breast cancer,Hepatitis C,Human papillomavirus infection,Non-small cell lung cancer,Hepatocellular carcinoma,Cushing syndrome,Pancreatic cancer, <b>Glioma</b>           | 1.10738E-09 | 1.07231E-07  |
| Pathways in cancer,Cellular senescence,Chronic myeloid leukemia,Pancreatic cancer                                                                                                                                                    | 1.08208E-09 | 1.09337E-07  |
| Pathways in cancer,Breast cancer,Non-small cell lung cancer,Pancreatic cancer                                                                                                                                                        | 1.08208E-09 | 1.09337E-07  |
| Pathways in cancer,Human papillomavirus infection,FoxO signaling pathway                                                                                                                                                             | 1.08208E-09 | 1.09337E-07  |
| Human cytomegalovirus infection,Kaposi sarcoma-associated herpesvirus infection,Human papillomavirus infection,Cellular senescence                                                                                                   | 5.26533E-10 | 1.11242E-07  |
| Pathways in cancer,PI3K-Akt signaling pathway,Endocrine resistance                                                                                                                                                                   | 1.52138E-09 | 1.17856E-07  |
| Human papillomavirus infection,AGE-RAGE signaling pathway in diabetic complications                                                                                                                                                  | 1.52138E-09 | 1.17856E-07  |
| Pathways in cancer,Breast cancer,Non-small cell lung cancer,Endocrine resistance,Pancreatic cancer                                                                                                                                   | 9.98868E-10 | 1.22177E-07  |
| Pathways in cancer,Cellular senescence                                                                                                                                                                                               | 8.99431E-10 | 1.22958E-07  |
| Pathways in cancer,Pancreatic cancer                                                                                                                                                                                                 | 1.07151E-09 | 1.24509E-07  |
| Human cytomegalovirus infection,Pathways in cancer,PI3K-Akt signaling pathway,Hepatitis C,Human papillomavirus infection,Pancreatic cancer                                                                                           | 6.44082E-10 | 1.24737E-07  |
| Pathways in cancer,Gastric cancer,PI3K-Akt signaling pathway,Endocrine resistance,Prostate cancer                                                                                                                                    | 1.51721E-09 | 1.25929E-07  |
| Pathways in cancer,Breast cancer,Endocrine resistance                                                                                                                                                                                | 9.83365E-10 | 1.26963E-07  |
| PI3K-Akt signaling pathway,Human papillomavirus infection                                                                                                                                                                            | 1.69894E-09 | 1.27366E-07  |
| Human cytomegalovirus infection,Pathways in cancer,Melanoma,Breast cancer,PI3K-Akt signaling pathway,Hepatitis C,Human papillomavirus infection,Non-small cell lung cancer,Hepatocellular carcinoma,Pancreatic cancer, <b>Glioma</b> | 8.81732E-10 | 1.28072E-07  |

**Table S3.** MiEAA top 25 KEGG enriched terms.

| Subcategory                                                           | P-value   | P-adjusted |
|-----------------------------------------------------------------------|-----------|------------|
| Chagas disease American trypanosomiasis                               | 3.13E-05  | 0.0050175  |
| Glucagon signaling pathway                                            | 4.65E-05  | 0.0050175  |
| Th1 and Th2 cell differentiation                                      | 3.75E-05  | 0.0050175  |
| Th17 cell differentiation                                             | 7.24E-05  | 0.0058637  |
| Carbohydrate digestion and absorption                                 | 0.000219  | 0.0141631  |
| AMPK signaling pathway                                                | 0.000403  | 0.0217674  |
| GnRH secretion                                                        | 0.000867  | 0.028694   |
| Huntington disease                                                    | 0.000886  | 0.028694   |
| Inflammatory bowel disease IBD                                        | 0.000735  | 0.028694   |
| Thyroid hormone signaling pathway                                     | 0.000812  | 0.028694   |
| Allograft rejection                                                   | 0.0011694 | 0.031573   |
| Non-alcoholic fatty liver disease NAFLD                               | 0.0011209 | 0.031573   |
| Acute myeloid leukemia                                                | 0.0015098 | 0.0349415  |
| Autoimmune thyroid disease                                            | 0.0014424 | 0.0349415  |
| Antigen processing and presentation                                   | 0.0017465 | 0.035367   |
| Type II diabetes mellitus                                             | 0.0016736 | 0.035367   |
| Aldosterone-regulated sodium reabsorption                             | 0.0020635 | 0.0393281  |
| Amoebiasis                                                            | 0.0026507 | 0.0442445  |
| Cholinergic synapse                                                   | 0.0025683 | 0.0442445  |
| Glycosaminoglycan biosynthesis - chondroitin sulfate dermatan sulfate | 0.0027311 | 0.0442445  |
| Phosphatidylinositol signaling system                                 | 0.0033911 | 0.0523206  |
| Adherens junction                                                     | 0.0051526 | 0.0536     |
| Arrhythmogenic right ventricular cardiomyopathy ARVC                  | 0.0046519 | 0.0536     |
| Ascorbate and aldarate metabolism                                     | 0.0046191 | 0.0536     |
| Bacterial invasion of epithelial cells                                | 0.0042319 | 0.0536     |

**Table S4.** MIENTURNET top 25 results KEGG enriched terms of each miRNA targets individually.

| microRNA       | Description                                              | p-value              | FDR                  |
|----------------|----------------------------------------------------------|----------------------|----------------------|
| hsa-miR-340-5p | Melanoma                                                 | 2.59967491035388E-12 | 1.0125049650852E-10  |
| hsa-miR-340-5p | Viral carcinogenesis                                     | 6.74257839364133E-11 | 1.31302842402489E-09 |
| hsa-miR-340-5p | FoxO signaling pathway                                   | 1.90666260320168E-10 | 2.4753163620513E-09  |
| hsa-miR-340-5p | Non-small cell lung cancer                               | 2.57821095097297E-10 | 2.51036329436842E-09 |
| hsa-miR-340-5p | MicroRNAs in cancer                                      | 1.91677810257791E-09 | 1.49306925885016E-08 |
| hsa-miR-340-5p | Epstein-Barr virus infection                             | 4.02659444750818E-09 | 2.48363138790062E-08 |
| hsa-miR-340-5p | Proteoglycans in cancer                                  | 4.46382398095652E-09 | 2.48363138790062E-08 |
| hsa-miR-340-5p | Human cytomegalovirus infection                          | 8.54900296120934E-09 | 4.16201459953613E-08 |
| hsa-miR-340-5p | Prolactin signaling pathway                              | 3.25158438545421E-08 | 1.40711838902697E-07 |
| hsa-miR-340-5p | Cellular senescence                                      | 4.0415912817941E-08  | 1.48052458901918E-07 |
| hsa-miR-340-5p | <b>Glioma</b>                                            | 4.62000631964526E-08 | 1.48052458901918E-07 |
| hsa-miR-340-5p | Pancreatic cancer                                        | 4.94175099307752E-08 | 1.48052458901918E-07 |
| hsa-miR-340-5p | Chronic myeloid leukemia                                 | 4.94175099307752E-08 | 1.48052458901918E-07 |
| hsa-miR-182-5p | Prostate cancer                                          | 3.00495649156945E-09 | 1.80297389494167E-07 |
| hsa-miR-340-5p | PI3K-Akt signaling pathway                               | 1.96463654727908E-07 | 5.46553024431023E-07 |
| hsa-miR-21-5p  | MicroRNAs in cancer                                      | 1.37950127101587E-08 | 1.23429061090894E-06 |
| hsa-miR-340-5p | Cell cycle                                               | 5.81468582370863E-07 | 1.50977807352435E-06 |
| hsa-miR-486-5p | Cellular senescence                                      | 5.22238532154296E-08 | 2.07477530143772E-06 |
| hsa-miR-486-5p | Hepatocellular carcinoma                                 | 7.58090975525323E-08 | 2.07477530143772E-06 |
| hsa-miR-21-5p  | FoxO signaling pathway                                   | 4.91218546675311E-08 | 2.19755665617902E-06 |
| hsa-miR-340-5p | Measles                                                  | 1.0270294043123E-06  | 2.50000578681283E-06 |
| hsa-miR-21-5p  | Signaling pathways regulating pluripotency of stem cells | 1.05171841857678E-07 | 3.13670405540443E-06 |
| hsa-miR-486-5p | Melanoma                                                 | 2.01894144563342E-07 | 3.26108890412478E-06 |
| hsa-miR-486-5p | <b>Glioma</b>                                            | 2.38310342993734E-07 | 3.26108890412478E-06 |
| hsa-miR-21-5p  | Proteoglycans in cancer                                  | 2.09943511723231E-07 | 3.9282064398909E-06  |

**Table S5.** TAM top 25 results where KEGG is not available due to TAM using its own annotations.

| Term                                      | P-value  | FDR      |
|-------------------------------------------|----------|----------|
| Carcinoma, Gastric                        | 5.67E-08 | 6.87E-05 |
| Carcinoma, Breast                         | 1.3E-07  | 7.88E-05 |
| Breast Neoplasms                          | 6.22E-07 | 0.000251 |
| Carcinoma, Prostate                       | 1.59E-06 | 0.00048  |
| Osteosarcoma                              | 3.52E-06 | 0.000852 |
| Carcinoma, Colon                          | 4.35E-06 | 0.000878 |
| Prostate Neoplasms                        | 5.12E-06 | 0.000886 |
| Atrial Fibrillation                       | 8.96E-06 | 0.00136  |
| Melanoma                                  | 1.25E-05 | 0.00168  |
| Carcinoma, Basal Cell                     | 2.31E-05 | 0.0028   |
| <b>Glioma</b>                             | 3.4E-05  | 0.00374  |
| Carcinoma, Thyroid                        | 4.11E-05 | 0.00414  |
| Carcinoma, Lung                           | 4.44E-05 | 0.00414  |
| Coronary Heart Diseases                   | 5.81E-05 | 0.0044   |
| Adenocarcinoma, Lung                      | 6.25E-05 | 0.00445  |
| Adenocarcinoma, Gastric                   | 5.67E-05 | 0.00458  |
| Carcinoma, Hepatocellular                 | 5.37E-05 | 0.00465  |
| Gastrointestinal Neoplasms                | 9.51E-05 | 0.00606  |
| hsa-mir-379 cluster                       | 0.000102 | 0.00619  |
| Ovarian Neoplasms                         | 9.25E-05 | 0.00623  |
| Lung Neoplasms                            | 0.000125 | 0.00719  |
| Acute Myocardial Infarction               | 0.000173 | 0.00912  |
| Polycystic Ovarian Syndrome               | 0.000171 | 0.00939  |
| Leukemia                                  | 0.000189 | 0.00956  |
| Early-Stage Non-Small-Cell Lung Carcinoma | 0.000228 | 0.011    |

**Table S6.** MiTALOS only 12 terms shown because a 0.05 significance cut-off is imposed. Also results from Wikipathways (wp) are shown.

| Source | Name                                                | p-value      |
|--------|-----------------------------------------------------|--------------|
| wp     | Mesodermal Commitment Pathway                       | 0.0006362389 |
| wp     | Endoderm Differentiation                            | 0.0028072615 |
| wp     | BMP Signalling and Regulation                       | 0.0049942647 |
| wp     | Neural Crest Differentiation                        | 0.0051841802 |
| wp     | BDNF signaling pathway                              | 0.0082582503 |
| kegg   | Circadian rhythm                                    | 0.0128012213 |
| kegg   | Axon guidance                                       | 0.0141600339 |
| kegg   | TGF-beta signaling pathway                          | 0.0269067405 |
| wp     | Ectoderm Differentiation                            | 0.0281909391 |
| wp     | Regulation of Microtubule Cytoskeleton              | 0.0426678613 |
| kegg   | Circadian entrainment                               | 0.0443499462 |
| wp     | Interactome of polycomb repressive complex 2 (PRC2) | 0.0466741508 |

**Table S7.** MiRSystem only 11 terms shown because a 0.05 significance cut-off is imposed.

| CATEGORY                     | TERM                                        | RAW_P_VALUE | EMPIRICAL_P_VALUE |
|------------------------------|---------------------------------------------|-------------|-------------------|
| PATHWAY_INTERACTION_DATABASE | PDGFR-BETA_SIGNALING_PATHWAY                | 5.44E-02    | 1.12E-01          |
| KEGG                         | COLORECTAL_CANCER                           | 2.75E-02    | 1.63E-01          |
| KEGG                         | VASCULAR_SMOOTH_MUSCLE_CONTRACTION          | 5.44E-02    | 1.66E-01          |
| PATHWAY_INTERACTION_DATABASE | SIGNALING_EVENTS_MEDIATED_BY_HDAC_CLASS_III | 1.74E-02    | 1.68E-01          |
| REACTOME                     | METABOLISM_OF_AMINO_ACIDS_AND_DERIVATIVES   | 7.36E-02    | 2.03E-01          |
| REACTOME                     | MUSCLE_CONTRACTION                          | 2.18E-02    | 2.42E-01          |
| KEGG                         | PATHWAYS_IN_CANCER                          | 1.29E-01    | 2.58E-01          |
| KEGG                         | ARGININE_AND_PROLINE_METABOLISM             | 2.40E-02    | 2.78E-01          |
| PATHWAY_INTERACTION_DATABASE | ATM_PATHWAY                                 | 1.52E-02    | 2.98E-01          |
| KEGG                         | SYSTEMIC_LUPUS_ERYTHEMATOSUS                | 5.85E-02    | 3.53E-01          |
| REACTOME                     | DNA_REPAIR                                  | 4.70E-02    | 3.88E-01          |

**Table S8.** DIANA miRPath top 25 terms enriched of targets obtained with microT-CDS

| KEGG pathway                                             | p-value           |
|----------------------------------------------------------|-------------------|
| Proteoglycans in cancer                                  | 4.24754302777E-12 |
| GABAergic synapse                                        | 7.29751476932E-07 |
| <b>Glioma</b>                                            | 7.29751476932E-07 |
| Signaling pathways regulating pluripotency of stem cells | 3.96577193346E-06 |
| ErbB signaling pathway                                   | 9.43103702335E-06 |
| Pathways in cancer                                       | 9.43103702335E-06 |
| Prion diseases                                           | 1.15236814217E-05 |
| TGF-beta signaling pathway                               | 1.9250366962E-05  |
| Adherens junction                                        | 1.9250366962E-05  |
| Prostate cancer                                          | 2.40147596687E-05 |
| Wnt signaling pathway                                    | 5.09311778067E-05 |
| Neurotrophin signaling pathway                           | 5.29898631152E-05 |
| Renal cell carcinoma                                     | 8.21252953281E-05 |
| Transcriptional misregulation in cancer                  | 8.82224240435E-05 |
| FoxO signaling pathway                                   | 0.000108567215874 |
| Hippo signaling pathway                                  | 0.000128403815899 |
| Thyroid hormone signaling pathway                        | 0.000128403815899 |
| Axon guidance                                            | 0.000141614237881 |
| T cell receptor signaling pathway                        | 0.000143100790325 |
| Glutamatergic synapse                                    | 0.000310995879636 |
| Pancreatic cancer                                        | 0.000354922474548 |
| Ras signaling pathway                                    | 0.00038388961646  |
| Focal adhesion                                           | 0.000557734213272 |
| Choline metabolism in cancer                             | 0.000585313623452 |
| Morphine addiction                                       | 0.000755390427698 |

**Table S9.** Web resources referenced in the main text whose URL has not been included are gathered in the following table.

| Resource  | Type               | URL                                                                                                             |
|-----------|--------------------|-----------------------------------------------------------------------------------------------------------------|
| miRCarta  | miRNA database     | <a href="https://mircarta.cs.uni-saarland.de">https://mircarta.cs.uni-saarland.de</a>                           |
| mirGeneDB | miRNA database     | <a href="http://mirgenedb.org">http://mirgenedb.org</a>                                                         |
| miRBase   | miRNA database     | <a href="http://www.mirbase.org">http://www.mirbase.org</a>                                                     |
| miRMaster | miRNA-seq analytic | <a href="https://ccb-compute.cs.uni-saarland.de/mirmaster">https://ccb-compute.cs.uni-saarland.de/mirmaster</a> |

|                                                               |                                            |                                                                                                                                                                                       |
|---------------------------------------------------------------|--------------------------------------------|---------------------------------------------------------------------------------------------------------------------------------------------------------------------------------------|
| miRCancer                                                     | miRNA annotations database                 | <a href="http://mircancer.ecu.edu">http://mircancer.ecu.edu</a>                                                                                                                       |
| miR2Disease                                                   | miRNA annotations database                 | <a href="http://www.mir2disease.org">http://www.mir2disease.org</a>                                                                                                                   |
| Human miRNA Disease Database (HMDD)                           | miRNA annotations database                 | <a href="http://www.cuilab.cn/hmdd">http://www.cuilab.cn/hmdd</a>                                                                                                                     |
| Mammal NcRNA-Disease Repository (MNDR)                        | miRNA annotations database                 | <a href="http://www.rna-society.org/mndr">http://www.rna-society.org/mndr</a>                                                                                                         |
| Plant miRNA Encyclopedia (PmiREN)                             | miRNA annotations database                 | <a href="http://www.pmiren.com">http://www.pmiren.com</a>                                                                                                                             |
| PhenomiR                                                      | miRNA annotations database                 | <a href="http://mips.helmholtz-muenchen.de/phenomiR">http://mips.helmholtz-muenchen.de/phenomiR</a>                                                                                   |
| SM2miR                                                        | miRNA annotations database                 | <a href="http://www.jianglab.cn/SM2miR/">http://www.jianglab.cn/SM2miR/</a>                                                                                                           |
| EpimiR                                                        | miRNA annotations database                 | <a href="http://bioinfo.hrbmu.edu.cn/EpimiR">http://bioinfo.hrbmu.edu.cn/EpimiR</a>                                                                                                   |
| miRPathDB                                                     | miRNA annotations database                 | <a href="https://mpd.bioinf.uni-sb.de">https://mpd.bioinf.uni-sb.de</a>                                                                                                               |
| Gene Ontology (GO)                                            | gene annotations database                  | <a href="http://geneontology.org">http://geneontology.org</a>                                                                                                                         |
| Kyoto Encyclopedia of Genes and Genomes (KEGG)                | gene annotations database                  | <a href="https://www.genome.jp/kegg">https://www.genome.jp/kegg</a>                                                                                                                   |
| Panther (Protein ANalysis THrough Evolutionary Relationships) | gene annotations database                  | <a href="http://www.pantherdb.org">http://www.pantherdb.org</a>                                                                                                                       |
| WikiPathways                                                  | gene annotations database                  | <a href="https://www.wikipathways.org">https://www.wikipathways.org</a>                                                                                                               |
| Online Mendelian Inheritance in Man (OMIM)                    | gene annotations database                  | <a href="https://www.omim.org">https://www.omim.org</a>                                                                                                                               |
| Human Phenotype Ontology (HPO)                                | gene annotations database                  | <a href="https://hpo.jax.org">https://hpo.jax.org</a>                                                                                                                                 |
| Disease Ontology                                              | gene annotations database                  | <a href="https://disease-ontology.org">https://disease-ontology.org</a>                                                                                                               |
| Reactome                                                      | gene annotations database                  | <a href="https://reactome.org">https://reactome.org</a>                                                                                                                               |
| Orphanet                                                      | drug and rare disease annotations database | <a href="https://www.orpha.net">https://www.orpha.net</a>                                                                                                                             |
| DECIPHER                                                      | Omics database                             | <a href="https://decipher.sanger.ac.uk">https://decipher.sanger.ac.uk</a>                                                                                                             |
| The Cancer Genome Atlas (TCGA)                                | Cancer omics database                      | <a href="https://www.cancer.gov/about-nci/organization/ccg/research/structural-genomics/tcga">https://www.cancer.gov/about-nci/organization/ccg/research/structural-genomics/tcga</a> |
| NCBI-Sequence Read Archive (SRA)                              | Omics database                             | <a href="https://www.ncbi.nlm.nih.gov/sra">https://www.ncbi.nlm.nih.gov/sra</a>                                                                                                       |

---

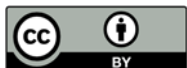

Supplement: biomolecules-10-01252-s001.pdf [file biomolecules-10-01252-s001.pdf]
